# Supplementary material
Source: HighWire-hosted journal article supplement (https://www.jrheum.org/highwire/filestream/35824/field_highwire_adjunct_files/0/171405DataSuppl.pdf)
Supplement: 171405DataSuppl.pdf [file 171405DataSuppl.pdf]

**ONLINE SUPPLEMENTARY DATA**

**Supplementary Table 1. Correlations of PROMIS short form instruments with other patient-reported outcomes at baseline**

| PROMIS Short form Instrument       | SF36 Subscales |        |        |        |        |        |        |        | SF36 Summary Scores |        | Global Assessment Scores |        |
|------------------------------------|----------------|--------|--------|--------|--------|--------|--------|--------|---------------------|--------|--------------------------|--------|
|                                    | Vital          | PF     | BP     | SF     | MH     | GH     | RE     | RP     | PCS                 | MCS    | PtGA                     | PhGA   |
| <b>Fatigue</b>                     | -0.67*         | -0.54* | -0.51* | -0.58* | -0.43* | -0.44* | -0.48* | -0.59* | -0.65*              | -0.53* | 0.48*                    | 0.17*  |
| <b>Physical function</b>           | 0.53*          | 0.74*  | 0.55*  | 0.51*  | 0.32*  | 0.41*  | 0.40*  | 0.64*  | 0.83*               | 0.32*  | -0.44*                   | -0.12* |
| <b>Pain Interference</b>           | -0.52*         | -0.51* | -0.64* | -0.54* | -0.41* | -0.35* | -0.44* | -0.53* | -0.70*              | -0.45* | 0.45*                    | 0.07   |
| <b>Applied cognitive abilities</b> | 0.47*          | 0.38*  | 0.38*  | 0.46*  | 0.47*  | 0.33*  | 0.46*  | 0.46*  | 0.42*               | 0.53*  | -0.31*                   | -0.08* |
| <b>Sleep disturbance</b>           | -0.37*         | -0.30* | -0.29* | -0.49* | -0.42* | -0.29* | -0.39* | -0.30* | -0.31*              | -0.53* | 0.33*                    | 0.15*  |
| <b>Social Participation</b>        | 0.55*          | 0.68*  | 0.52*  | 0.65*  | 0.45*  | 0.39*  | 0.49*  | 0.63*  | 0.76*               | 0.49*  | -0.51*                   | -0.15* |
| <b>Social isolation</b>            | -0.43*         | -0.34* | -0.28* | -0.47* | -0.55* | -0.32* | -0.42* | -0.38* | -0.27*              | -0.57* | 0.21*                    | 0.04   |
| <b>Anxiety</b>                     | -0.44*         | -0.26* | -0.26* | -0.45* | -0.62* | -0.28* | -0.51* | -0.34* | -0.19*              | -0.66* | 0.22*                    | 0.00   |

Spearman correlation coefficients between scores from 10 PROMIS Short form instruments, SF36 subscales, SF-36 summary scores and physician- and patient global assessment scores.

PROMIS = Patient -Reported Outcomes Measurement Information System, CAT = Computer adaptive testing, SF36= Short form 36, Vital. = Vitality, PF = Physical function, BP = bodily pain, SF = social function, MH = mental health, GH= general health, RE = role emotional, RP = role physical, PCS = physical component summary, MCS = mental component summary PtGA = Patient global assessment for disease activity, PhGA = Physician global assessment for disease activity.

\*p<0.05

**Supplementary Table 2. Longitudinal correlations of PROMIS short form instruments with other patient-reported outcomes at baseline**

| PROMIS Short form Instrument | SF36 Subscales |        |        |        |        |        |        |        | SF36 Summary Scores |        | Global Assessment Scores |        |
|------------------------------|----------------|--------|--------|--------|--------|--------|--------|--------|---------------------|--------|--------------------------|--------|
|                              | Vital          | PF     | BP     | SF     | MH     | GH     | RE     | RP     | PCS                 | MCS    | PtGA                     | PhGA   |
| Fatigue                      | -0.56*         | -0.42* | -0.42* | -0.44* | -0.35* | -0.34* | -0.56* | -0.42* | -0.42*              | -0.44* | -0.35*                   | -0.34* |
| Physical function            | 0.41*          | 0.58*  | 0.38*  | 0.35*  | 0.23*  | 0.29*  | 0.41*  | 0.58*  | 0.38*               | 0.35*  | 0.23*                    | 0.29*  |
| Pain Interference            | -0.34*         | -0.35* | -0.45* | -0.37* | -0.27* | -0.24* | -0.34* | -0.35* | -0.45*              | -0.37* | -0.27*                   | -0.24* |
| Applied cognitive abilities  | 0.38*          | 0.28*  | 0.25*  | 0.28*  | 0.38*  | 0.22*  | 0.38*  | 0.28*  | 0.25*               | 0.28*  | 0.38*                    | 0.22*  |
| Sleep disturbance            | -0.24*         | -0.23* | -0.20* | -0.32* | -0.08  | -0.16* | -0.24* | -0.23* | -0.20*              | -0.32* | -0.08                    | -0.16* |
| Social Participation         | 0.37*          | 0.30*  | 0.36*  | 0.36*  | 0.17*  | 0.20*  | 0.37*  | 0.30*  | 0.36*               | 0.36*  | 0.17*                    | 0.20*  |
| Social isolation             | -0.16*         | -0.17* | -0.20* | -0.24* | -0.27* | -0.15* | -0.16* | -0.17* | -0.20*              | -0.24* | -0.27*                   | -0.15* |
| Anxiety                      | -0.27*         | -0.14* | -0.23* | -0.19* | -0.34* | -0.10  | -0.27* | -0.14* | -0.23*              | -0.19* | -0.34*                   | -0.10  |

Spearman correlation coefficients between change in scores from 10 PROMIS Short form instruments with change in SF36 subscales, SF-36 summary scores and physician- and patient global assessment scores.

PROMIS = Patient -Reported Outcomes Measurement Information System, CAT = Computer adaptive testing, SF36 = Short form 36, Vital. = Vitality, PF = Physical function, BP = bodily pain, SF = social function, MH = mental health, GH = general health, RE = role emotional, RP = role physical, PCS = physical component summary, MCS = mental component summary, PtGA = Patient global assessment for disease activity, PhGA = Physician global assessment for disease activity.

\*p<0.05
